# Supplementary material for: Putative Protein Discovery from Microalgal Genomes as a Synthetic Biology Protein Library for Heavy Metal Bio-Removal
Source: MDPI journal article supplement (doi:10.3390/biology11081226), 2022-08-17
Supplement: s1 [file s1]

**Table S2.** A list of target proteins in this study and their search results from UniprotKB

| Protein                                                             | Keyword                         | Number of hits | Number of selected proteins |
|---------------------------------------------------------------------|---------------------------------|----------------|-----------------------------|
| <b>Bioaccumulation</b>                                              |                                 |                |                             |
| $\gamma$ -glutamylcysteine synthetase or Glutamate--cysteine ligase | Glutamate--cysteine ligase      | 456            | 321                         |
| glutathione gamma-glutamylcysteinyltransferase                      | Phytochelatin synthase          | 11             | 8                           |
| Glutathione synthetase                                              | Glutathione synthetase          | 357            | 80                          |
| <b>Biotransformation</b>                                            |                                 |                |                             |
| Mercuric reductase                                                  | mercuric reductase              | 46             | 13                          |
| Arsenate reductase                                                  | arsenate reductase              | 137            | 64                          |
| Chromate reductase                                                  | chrR                            | 9              | 6                           |
| <b>Metal transportation</b>                                         |                                 |                |                             |
| Heavy metal transporting ATPase (HMA)                               | Copper-transporting ATPase      | 43             | 38                          |
|                                                                     | Manganese-transporting ATPase   | 2              | 2                           |
|                                                                     | Cadmium-transporting ATPase     | 7              | 7                           |
|                                                                     | Zinc-transporting ATPase        | 10             | 10                          |
|                                                                     | Lead-transporting ATPase        | 2              | 2                           |
| Inorganic phosphate transporter                                     | Inorganic phosphate transporter | 712            | 52                          |
| Manganese transporter domain                                        | MntC                            | 7              | 6                           |
| Manganese transporter domain                                        | MntA                            | 28             | 9                           |
| Manganese transporter domain                                        | MntB                            | 9              | 5                           |

|                                                        |                           |     |     |
|--------------------------------------------------------|---------------------------|-----|-----|
| Manganese transporter domain                           | MntD                      | 4   | 1   |
| Mercuric transport protein (cytoplasmic/transmembrane) | MerT                      | 24  | 11  |
| Mercuric transport protein (periplasmic)               | MerP                      | 44  | 10  |
| Zinc-regulated transporter                             | ZRT                       | 106 | 4   |
| Zinc transporter                                       | ZIP                       | 520 | 154 |
| Natural resistance-associated macrophage protein       | NRAMP1                    | 20  | 11  |
| Copper transporter                                     | COPT1                     | 10  | 8   |
| <b>Cellular tolerance</b>                              |                           |     |     |
| Ascorbate peroxidase                                   | ascorbate peroxidase      | 48  | 20  |
| Superoxide dismutase                                   | superoxide dismutase      | 602 | 476 |
| Heme oxygenase                                         | heme oxygenase 1          | 412 | 11  |
| Glutathione peroxidase                                 | glutathione peroxidase    | 279 | 107 |
| Glutathione S-transferase                              | glutathione S-transferase | 442 | 360 |

\*Transcriptional factors e.g., metal-tolerant proteins (MTPs), metalloregulatory proteins are not included in the list
