# Supplementary material for: Putative Protein Discovery from Microalgal Genomes as a Synthetic Biology Protein Library for Heavy Metal Bio-Removal
Source: MDPI journal article supplement (doi:10.3390/biology11081226), 2022-08-17
Supplement: s1 [file s1]

## Supplementary information

**Table S1.** List of bioinformatic webtools used in this study

| Software                                          | URL                                                                                                                                   | Remark                                                                 |
|---------------------------------------------------|---------------------------------------------------------------------------------------------------------------------------------------|------------------------------------------------------------------------|
| <b>Amino acid sequence retrieval</b>              |                                                                                                                                       |                                                                        |
| Uniprot                                           | <a href="https://www.uniprot.org/">https://www.uniprot.org/</a>                                                                       | Protein database                                                       |
| <b>Sequence similarity search</b>                 |                                                                                                                                       |                                                                        |
| BLAST: Basic<br>Local<br>Alignment<br>Search Tool | <a href="https://www.ncbi.nlm.nih.gov/">https://www.ncbi.nlm.nih.gov/</a>                                                             | BLASTp is used to search for similar sequences from microalgal genomes |
| <b>Protein function prediction</b>                |                                                                                                                                       |                                                                        |
| BLAST: Basic<br>Local<br>Alignment<br>Search Tool | <a href="https://www.ncbi.nlm.nih.gov/">https://www.ncbi.nlm.nih.gov/</a>                                                             | Primary function prediction                                            |
| <b>Final Validation</b>                           |                                                                                                                                       |                                                                        |
| InterProScan                                      | <a href="http://www.ebi.ac.uk/InterProScan/">http://www.ebi.ac.uk/InterProScan/</a>                                                   | Function prediction                                                    |
| SUPERFAMILY 2.0                                   | <a href="http://supfam.org">http://supfam.org</a>                                                                                     | Function prediction                                                    |
| CATH                                              | <a href="https://www.cathdb.info/">https://www.cathdb.info/</a>                                                                       | Function prediction                                                    |
| Pfam                                              | <a href="http://pfam.xfam.org/">http://pfam.xfam.org/</a>                                                                             | Function prediction                                                    |
| SignalP 5.0                                       | <a href="https://services.healthtech.dtu.dk/service.php?SignalP-5.0">https://services.healthtech.dtu.dk/service.php?SignalP-5.0</a>   | Subcellular localization                                               |
| Alphafold2                                        | <a href="https://github.com/sokrypton/ColabFold">https://github.com/sokrypton/ColabFold</a>                                           | Structure modelling                                                    |
| Modelarchive                                      | <a href="https://modelarchive.org/">https://modelarchive.org/</a>                                                                     | Structure archive                                                      |
| ProFunc                                           | <a href="https://www.hsls.pitt.edu/obrc/index.php?page=URL1125088260">https://www.hsls.pitt.edu/obrc/index.php?page=URL1125088260</a> | Structure-based annotation                                             |
